# Supplementary material
Source: PubMed Central journal article supplement (PMC10528529)
Supplement: NIHMS1916178-supplement-1.pdf [file NIHMS1916178-supplement-1.pdf]

Supporting Information

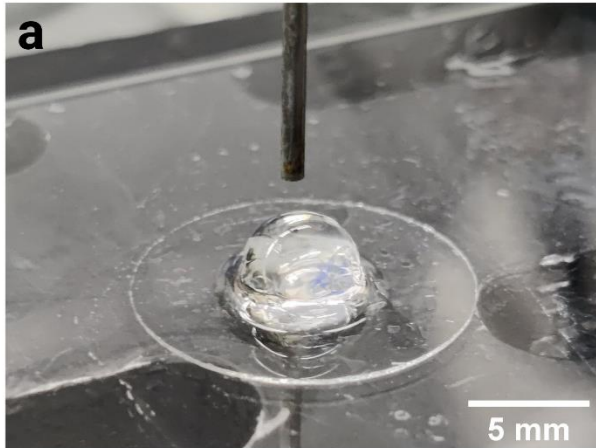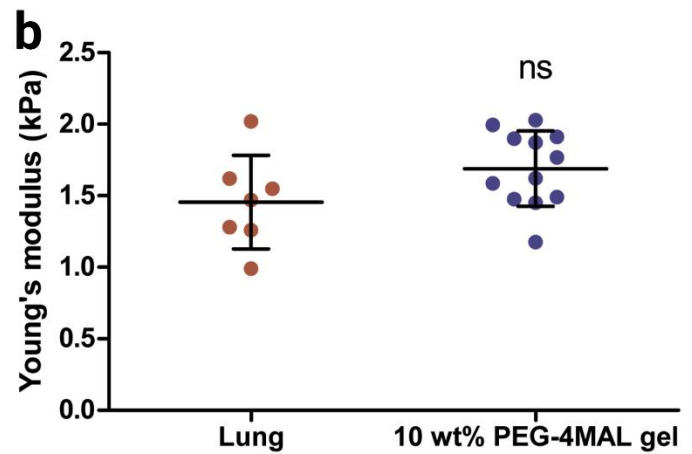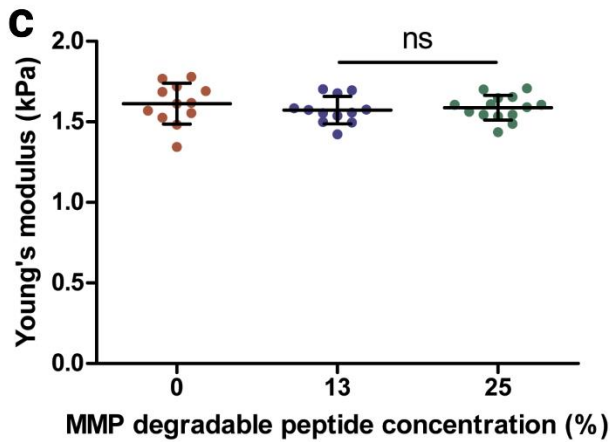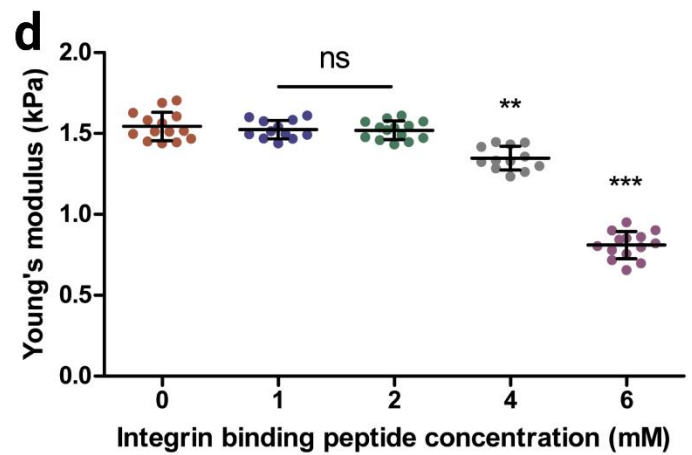

**Supplementary Figure 1. Mechanical characterization of lung hydrogels using micro-indentation method.** a) Representative image of lung hydrogel after 24 hours of swelling in 1X PBS. Modulus of the hydrogel was measured using micro-indentation method with a 1 mm diameter flat probe. b) Effective modulus of 10 wt% 4-arm PEG-maleimide hydrogel without bioactive peptide ligands using micro-indentation replicated the lung modulus measured using the same method. c) Effective modulus of 10 wt% 4-arm PEG-maleimide hydrogel containing different molar concentrations of MMP-degradable peptide crosslinkers using micro-indentation method. The tested peptide crosslinker molar concentrations were 0%, 13% and 25%. d) Effective modulus of 10 wt% 4-arm PEG-maleimide hydrogel containing different molar concentrations of integrin-binding peptide moieties using micro-indentation method. The tested peptide molar concentrations were 0 mM, 1 mM, 2 mM, 4 mM, and 6 mM.

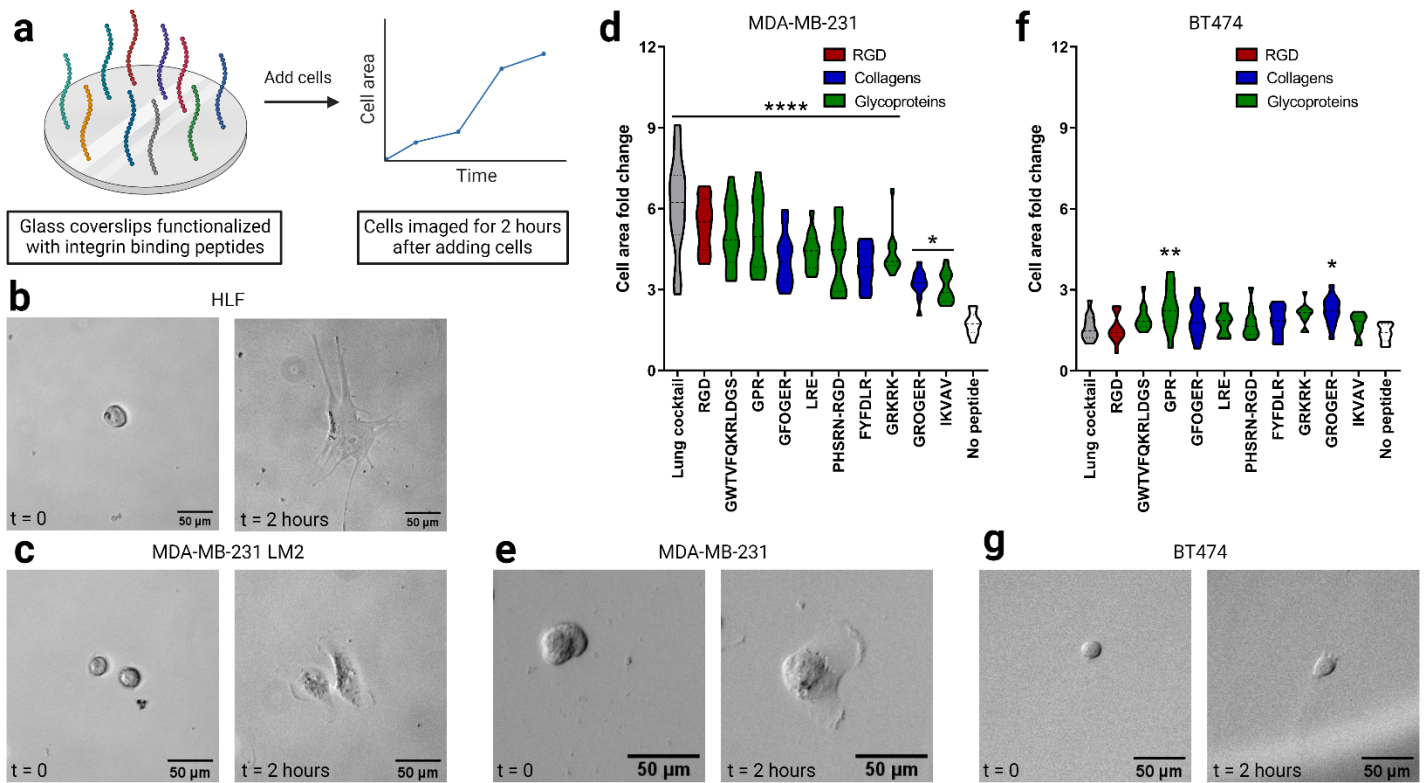

**Supplementary Figure 2. Functional validation of lung integrin-binding peptides.** a) Schematics of the cell attachment assay where cells were seeded on glass coverslips functionalized with lung integrin-binding peptides and the cells were imaged for 2 hours. b) Representative images of HLFs at time  $t = 0$  and  $t = 2$  hours. c) Representative images of MDA-MB-231 LM2 cells at time  $t = 0$  and  $t = 2$  hours. d) Cell area fold change for MDA-MB-231 cells in compared to negative control. e) Representative images of MDA-MB-231 cells at time  $t = 0$  and  $t = 2$  hours. f) Cell area fold change for BT474 cells in compared to negative control. g) Representative images of BT474 cells at time  $t = 0$  and  $t = 2$  hours.

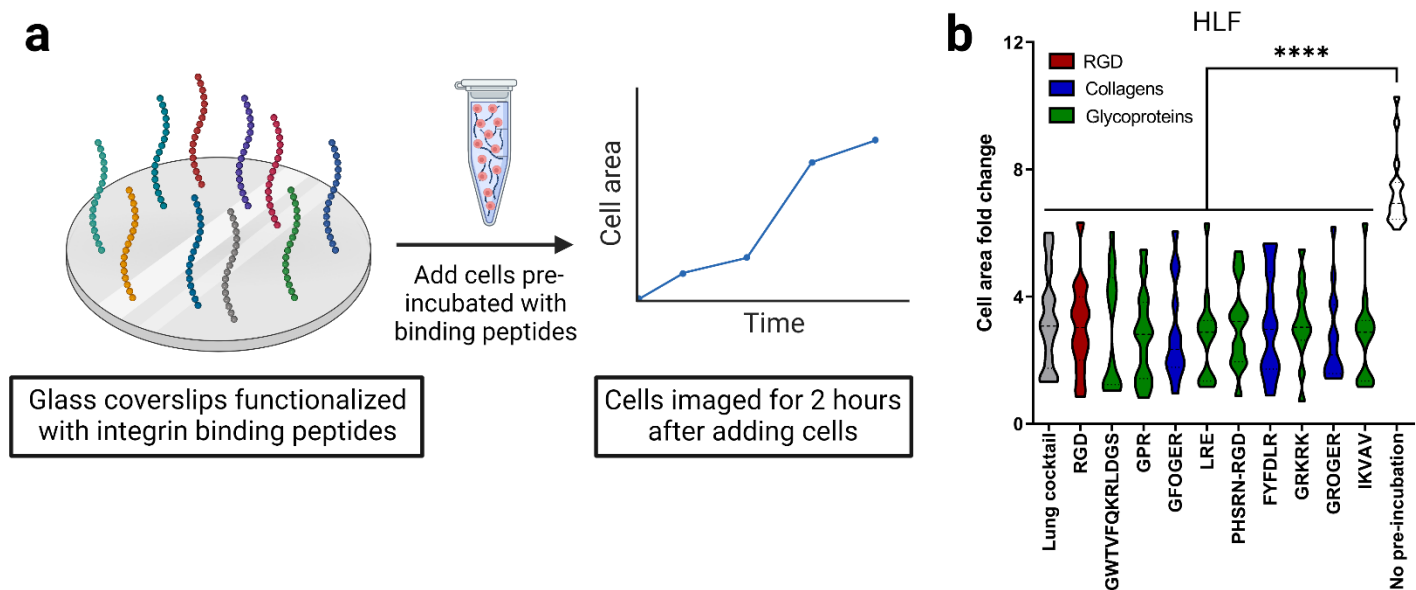

**Supplementary Figure 3. Competitive cell attachment assay on lung integrin-binding peptides using HLFs.** a) Schematics of the competitive cell binding assay where HLFs pre-incubated with individual lung integrin-binding peptides were seeded on glass coverslips functionalized with lung integrin-binding peptide cocktail and the cells were imaged for 2 hours. b) Representative images of HLFs (pre-incubated with individual binding peptides) at time  $t = 0$  and  $t = 2$  hours.

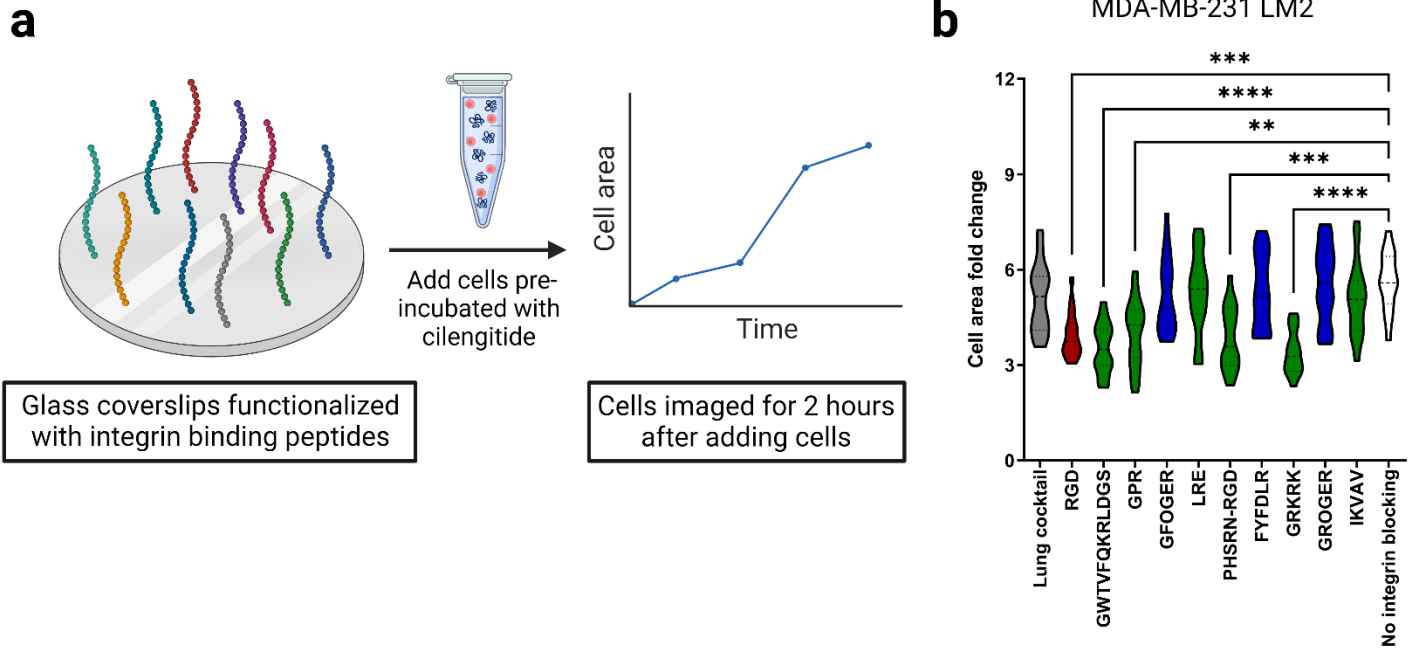

**Supplementary Figure 4. Integrin-specific cell attachment with lung integrin-binding peptides.** a) Schematics of the competitive cell binding assay where HLFs pre-incubated with cilengitide were seeded on glass coverslips functionalized with lung integrin-binding peptide cocktail and the cells were imaged for 2 hours. b) Cell area fold change 2 hours after seeding HLFs (pre-incubated with cilengitide) onto glass coverslips functionalized with integrin-binding peptide cocktail relative to a negative control (cells not pre-incubated with cilengitide).



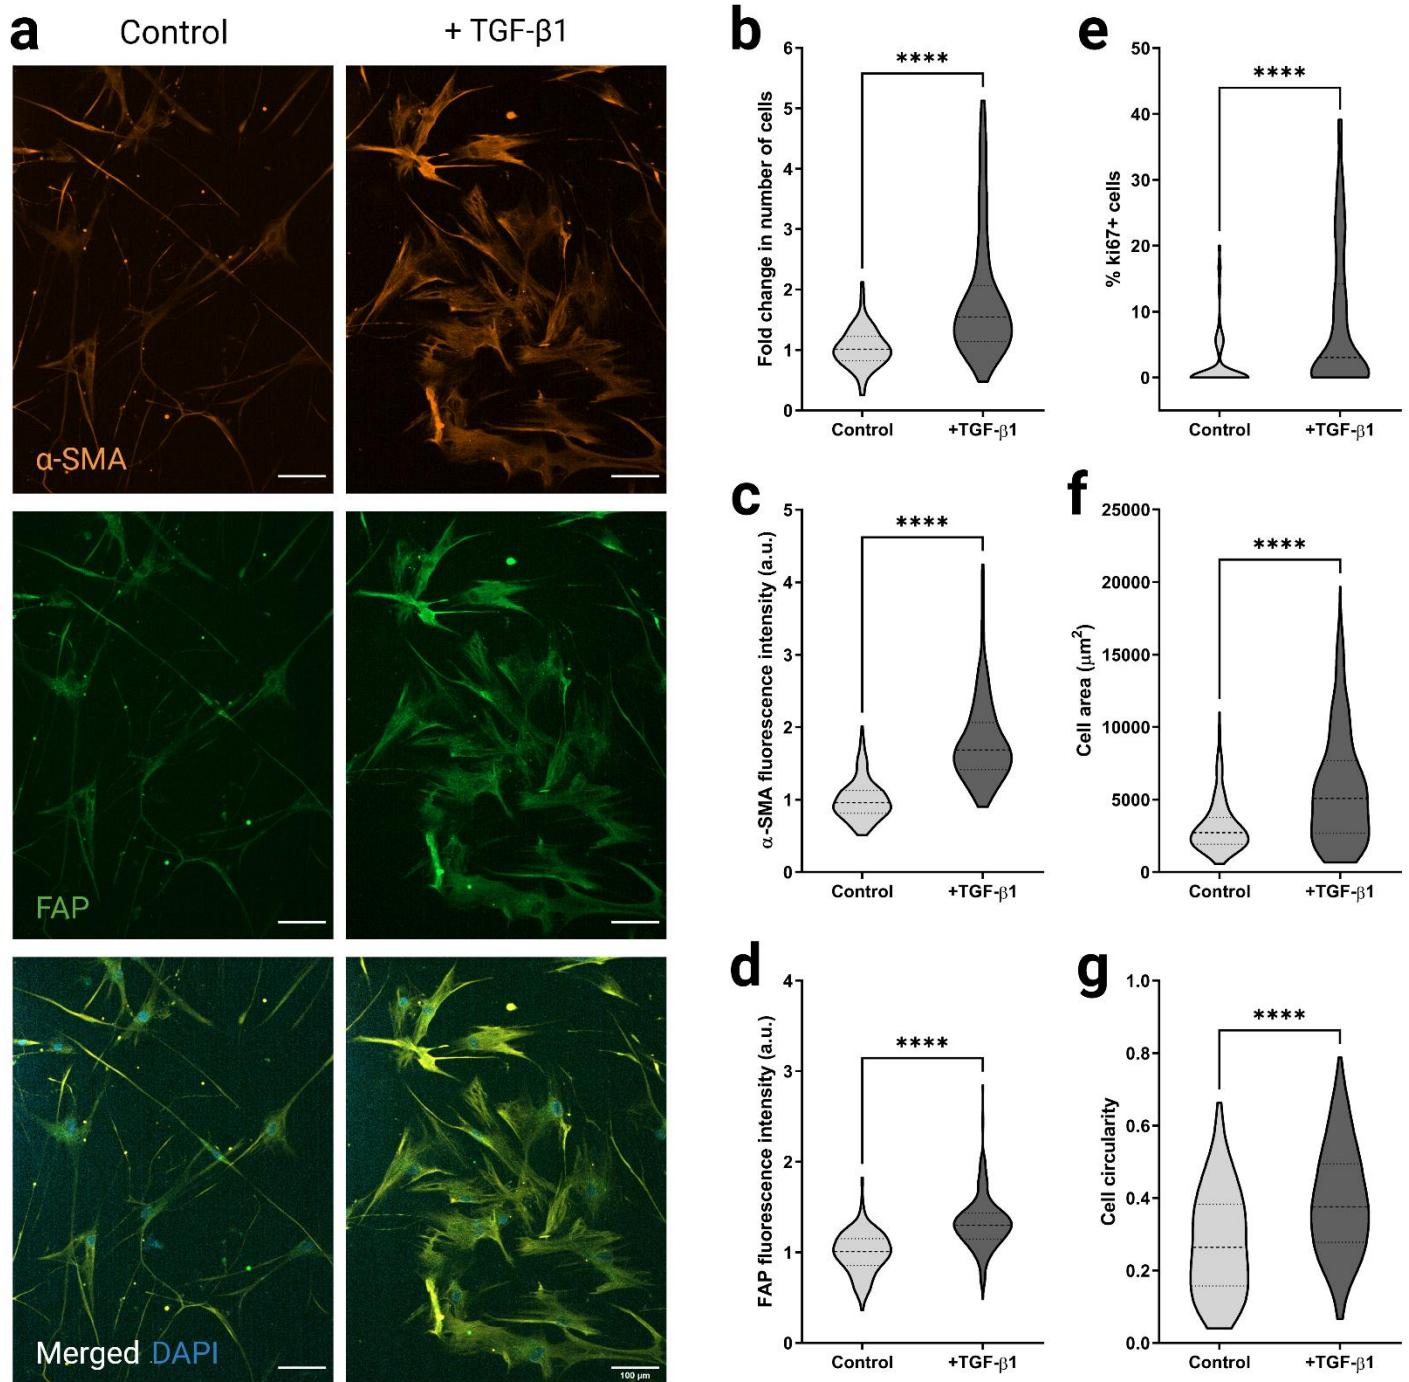

**Supplementary Figure 5. Fibroblast phenotype and activation on TCPS.** (a) Representative fluorescent images of HLFs cultured on TCPS with or without pro-fibrotic cytokine, TGF- $\beta$ 1 showing  $\alpha$ -SMA (orange), and FAP (green) expressions along with merged HLF images with nuclei staining with DAPI (blue). (b) Fold change in cell count for non-activated (cultured without TGF- $\beta$ 1) and activated (cultured with TGF- $\beta$ 1) HLFs on TCPS representing cell proliferation characteristics. (c) Quantification of  $\alpha$ -SMA expression from non-activated and activated HLFs cultured on TCPS. (d) Quantification of FAP expression from non-activated and activated HLFs cultured on TCPS. (e) Percentage of proliferative ki67+ cells in non-activated and activated HLF cultures on TCPS. (f) Cell area for non-activated and activated HLFs cultured on TCPS. (g) Cell circularity for non-activated and activated HLFs cultured on TCPS.

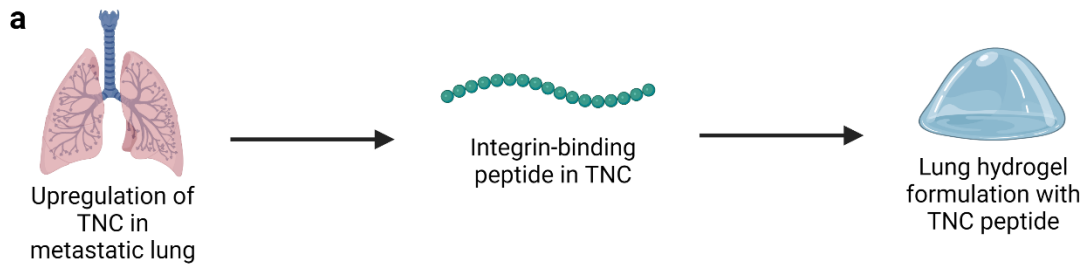

**b**

| ECM proteins                                                                                                                                                      | with known                                                  | integrin-binding domains                                    |
|-------------------------------------------------------------------------------------------------------------------------------------------------------------------|-------------------------------------------------------------|-------------------------------------------------------------|
| Collagen VI ( $\alpha 1$ , $\alpha 2$ , and $\alpha 3$ ), Emilin I, Fibrillin I, Fibrinogen $\beta$ , Nidogen I, Nephronectin, Vitronectin, von Willebrand Factor | Fibrinogen $\alpha$                                         | Collagen IV ( $\alpha 1$ , $\alpha 2$ )                     |
|                                                                                                                                                                   | <b>GPRGGC</b> , 8%                                          | <b>GCGFYFDLR</b> , 4%                                       |
|                                                                                                                                                                   | Collagen I ( $\alpha 1$ , $\alpha 2$ )                      | Elastin                                                     |
| <b>GRGDSPCG</b> , 32%                                                                                                                                             | CGP(GPP) <sub>5</sub> <b>GFOGER</b> (GPP) <sub>5</sub> , 6% | <b>GCGRKRK</b> , 2%                                         |
| Tenascin C                                                                                                                                                        | Laminin $\gamma$                                            | Collagen III ( $\alpha 1$ )                                 |
| <b>CGGAEIDGIEL</b> , 22%                                                                                                                                          | <b>GCKQLREQ</b> , 6%                                        | CGP(GPP) <sub>5</sub> <b>GROGER</b> (GPP) <sub>5</sub> , 2% |
| Fibrinogen $\gamma$                                                                                                                                               | Fibronectin                                                 | Laminin $\alpha$                                            |
| <b>GCGWTVFQKRLDGS</b> , 10%                                                                                                                                       | CGPHSRNG <sub>5</sub> <b>RGDS</b> , 5%                      | CSRARKQAASIKVAVADR, 2%                                      |

**c**

| Synthesize                     | peptides | degradable by target              | MMPs |
|--------------------------------|----------|-----------------------------------|------|
| MMP1                           |          | MMP2                              |      |
| <b>GCRDVPMS/MRGGDRCG</b> , 16% |          | <b>GCRDSGESPAY/YTADRRCG</b> , 16% |      |
| MMP3                           |          | MMP7                              |      |
| <b>GCRDRPFS/MIMGDRCG</b> , 16% |          | <b>GCRDVPLS/LTMGDRCG</b> , 16%    |      |
| MMP9                           |          | MMP13                             |      |
| <b>GCRDVPLS/LYSGDRCG</b> , 12% |          | <b>GCRDGPLG/LWARDRCG</b> , 13%    |      |
|                                |          | MMP14                             |      |
|                                |          | <b>GCRDIPES/LRAGDRCG</b> , 12%    |      |

**Supplementary Figure 6. List and quantities of metastatic lung-specific integrin-binding and MMP-degradable peptides.** a) Schematic of identification of metastatic lung ECM-specific integrin-binding and MMP-degradable peptides. b) List of identified integrin-binding peptide domains with their relative quantities corresponding to metastatic lung ECM proteins. c) List of identified MMP-degradable peptide domains with their relative quantities corresponding to the different MMPs.
